# Supplementary figures and images for: A photo-polymerized poly(Nε-acryloyll-lysine) hydrogel for 3D culture of MCF-7 breast cancer cells
Source: Royal Society of Chemistry journal article supplement (doi:10.1039/c6tb00511j), 2016-01-01

Supplementary figures.

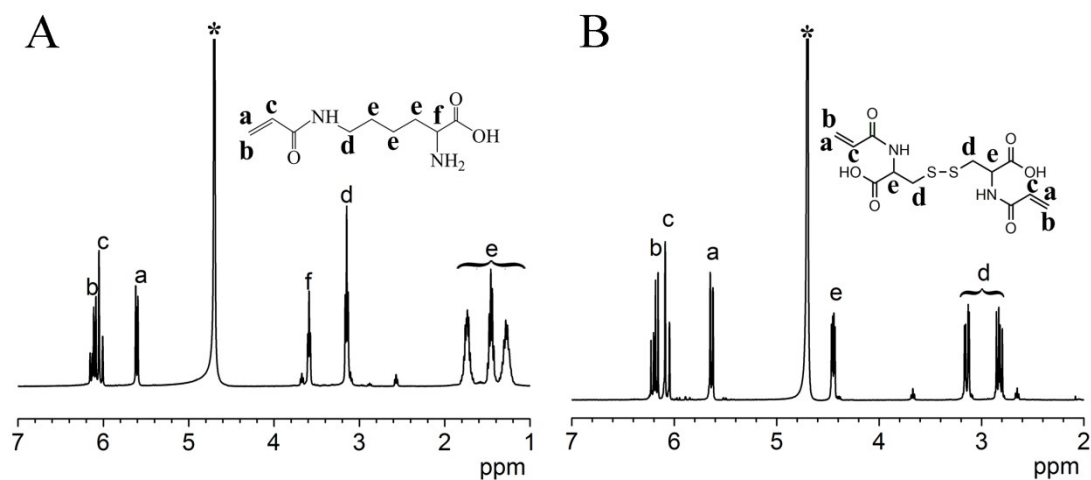

Fig. S1  $^1\text{H}$  NMR spectra of (A) LysAAm and (B) BACystine in  $\text{D}_2\text{O}$

Supplement: c6tb00511j1.pdf [file c6tb00511j1.pdf]
